# Supplementary material
Source: PubMed Central journal article supplement (PMC1857731)
Supplement: pgen.0030066.sd002.pdf [file pgen.0030066.sd002.pdf]

## Protocol S1: Testing for inbreeding

**Distribution of mean heterozygosity within individuals ( $H_w$ ):** We carry out a separate analysis for (a) 34 wild-caught, (b) 14 captive-born western chimpanzees, and (c) 13 wild-caught central chimpanzees. We assigned individuals to subpopulations according to the results of STRUCTURE, excluding individuals with >5% ancestry in more than one population. The red vertical lines are the mean  $H_w$  in each population and the blue lines are the mean  $H_w$  in permutations. The mean  $H_w$  is significantly lower (at the  $P<0.05$  significance level) than expected by the randomized  $H_w$  in all populations (see text and table below).

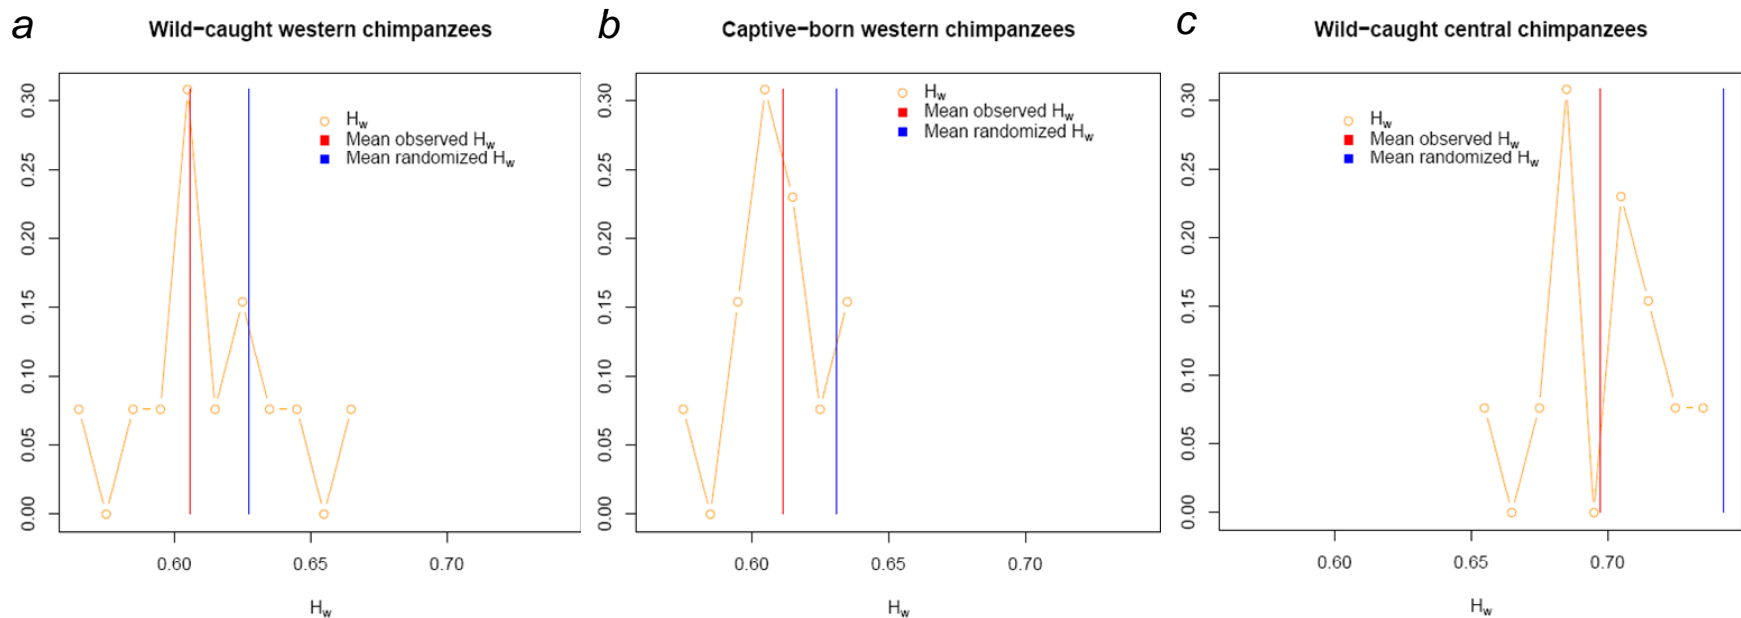

**Distribution of mean squared difference in repeat units within individuals ( $R_w$ , orange):** We carry out a separate analysis for (a) 34 wild-caught, (b) 14 captive-born western chimpanzees and (c) 13 wild-caught central chimpanzees. We assigned individuals to subpopulations according to the results of STRUCTURE, excluding individuals with >5% ancestry in more than one population. The red vertical lines are the mean  $R_w$  in each population and the blue lines are the mean  $R_w$  from permutation. Mean  $R_w$  is significantly lower ( $P<0.05$ ) than expected by the randomized  $R_w$  in wild-caught western and central chimpanzees (see text and table below).

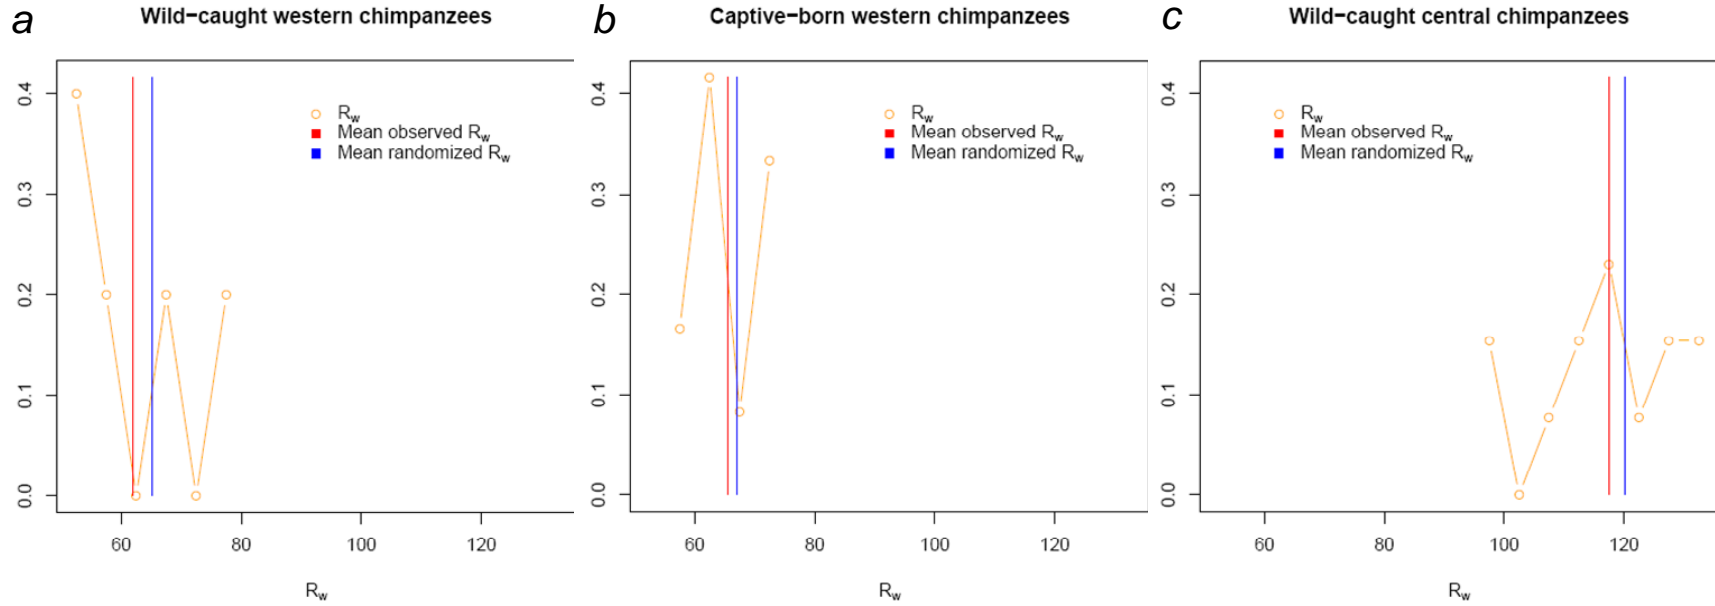

**Mean heterozygosity within individuals from each population:** The samples are 34 wild-caught western chimpanzees, 14 captive-born western chimpanzees and 13 wild-caught central chimpanzees. The p-value for being lower than expected, calculated from 1,000 permutations, is indicated in parentheses (see Methods).

|         | Wild-caught          | Captive-born         |
|---------|----------------------|----------------------|
| Western | 0.606 ( $<10^{-3}$ ) | 0.611 ( $<10^{-3}$ ) |
| Central | 0.697 ( $<10^{-3}$ ) | —                    |

**Mean squared difference in repeat units within individuals in each population:** The samples are 34 wild-caught western chimpanzees, 14 captive-born western chimpanzees and 13 wild-caught central chimpanzees. The p-value, calculated from 1,000 permutations, is indicated in parentheses (see Methods).

|         | Wild-caught   | Captive-born |
|---------|---------------|--------------|
| Western | 61.9 (0.001)  | 65.5 (0.208) |
| Central | 117.6 (0.186) | —            |
