# Supplementary material
Source: PubMed Central journal article supplement (PMC1857731)

### Supplementary figure 2:

Distributions of the expected  $\sigma_i^2$  over markers, for observed and simulated data sets. The distributions of  $E(\sigma_i^2)$  were computed separately for 221 tetra- (a), 62 tri- (b) and 11 di-nucleotides (c) genotyped typed in the 49 western samples (shown in blue). In red are the results of 500 simulations for each class of microsatellite. In all three cases, the observed distribution is not significantly different from the expected distribution, as assessed by a permutation test (see Methods for more details).

**a.**

**b.**

Simulated vs. observed  $E(\sigma_i^2)$  for autosomal tetra-nucleotides:

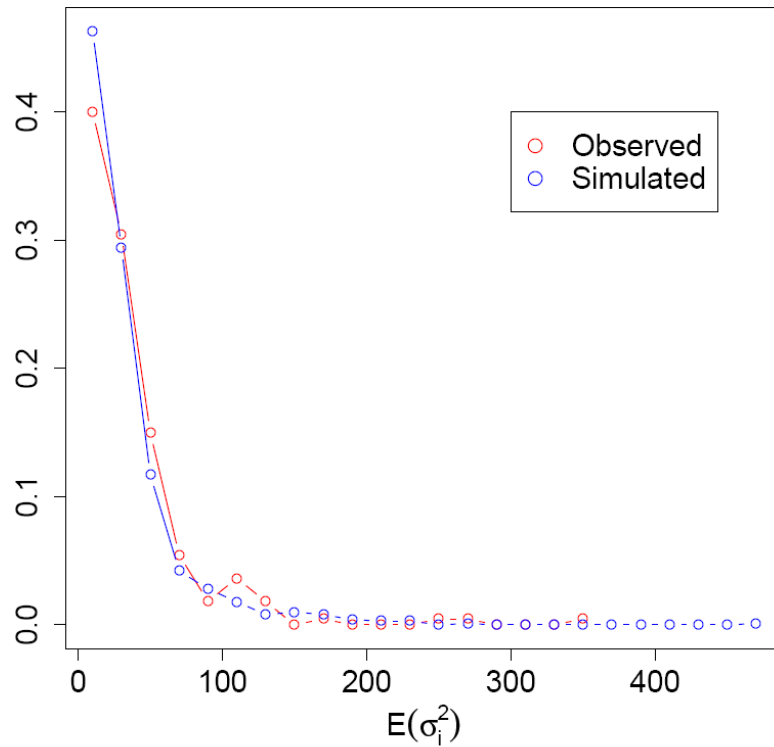

Simulated vs. observed  $E(\sigma_i^2)$  for autosomal tri-nucleotides:

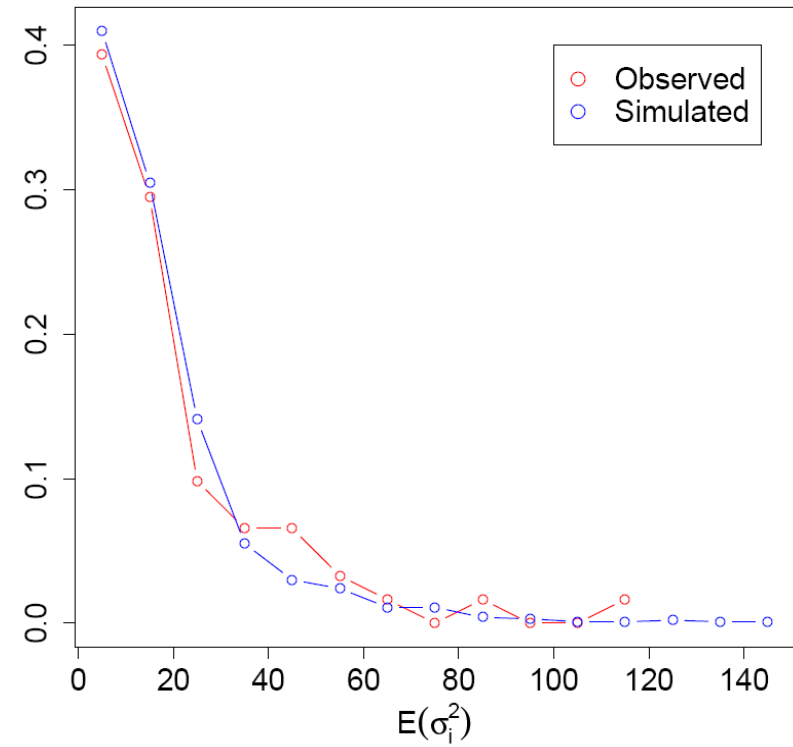

c.

Simulated vs. observed  $E(\sigma_i^2)$  for autosomal di-nucleotides

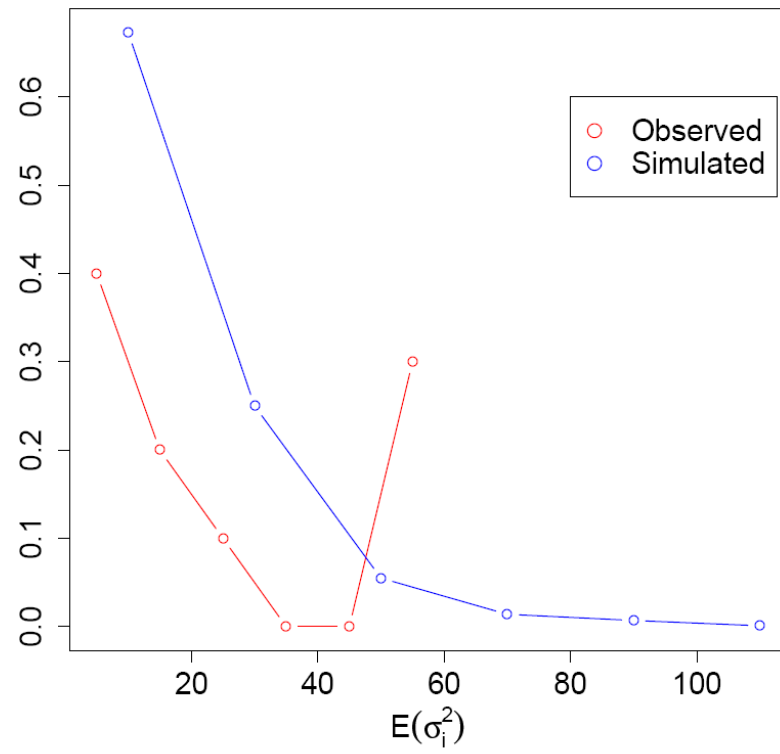

Supplement: pgen.0030066.sg002.pdf [file pgen.0030066.sg002.pdf]
