# Supplementary material
Source: PubMed Central journal article supplement (PMC1857731)
Supplement: pgen.0030066.st001.pdf [file pgen.0030066.st001.pdf]

| Name        | location on chromosome | Locus or alias  | Rep | Physical Map | Informativness | # alleles | allele size range |     |
|-------------|------------------------|-----------------|-----|--------------|----------------|-----------|-------------------|-----|
| GATA32C10   | Y                      | DYS391          | 4   | 13112029     | 1.07515        | 5         | 289               | 317 |
| GGAA4B09N   | 3                      | D3S2403         | 4   | 13147403     | 1.01563        | 17        | 204               | 269 |
| GATA104     | 7                      |                 | 4   | 143115408    | 0.997608       | 27        | 173               | 227 |
| GATA129H04  | 1                      | D1S3721         | 4   | 41139784     | 0.965041       | 29        | 188               | 255 |
| GATA164B08P | 3                      | D3S4545         | 4   | 8500000      | 0.901269       | 27        | 213               | 258 |
| GATA11A06   | 18                     | D18S542         | 4   | 11482759     | 0.898777       | 30        | 167               | 210 |
| GATA61E03   | 6                      | D6S1051         | 4   | 36679852     | 0.894083       | 12        | 207               | 251 |
| ATTT030     | 6                      |                 | 4   | 9540286      | 0.881354       | 12        | 104               | 136 |
| GATA176C01  | 2                      | D2S2972         | 4   | 102193472    | 0.864309       | 29        | 198               | 270 |
| GATA71H05   | 16                     | D16S769         | 4   | 26125312     | 0.863574       | 25        | 242               | 300 |
| ATA27A06P   | 12                     | D12S1042        | 3   | 28000000     | 0.862575       | 10        | 116               | 146 |
| GATA43A04   | 1                      | D1S1653         | 4   | 155149568    | 0.856855       | 29        | 116               | 229 |
| GATA14E09   | 8                      | D8S2324         | 4   | 74304288     | 0.854694       | 13        | 184               | 218 |
| GATA116B01N | 2                      | D2S2952         | 4   | 8099777      | 0.852129       | 20        | 142               | 207 |
| GATA50G06   | 15                     | D15S643         | 4   | 57429880     | 0.842507       | 19        | 187               | 259 |
| ATA25F04    | Y                      | DYS392          | 3   | 21478942     | 0.840013       | 7         | 244               | 265 |
| UT7544      | 19                     | D19S559         | 4   | 50022064     | 0.839055       | 17        | 148               | 177 |
| GATA43C11   | 7                      | D7S1804         | 4   | 131695864    | 0.836512       | 20        | 214               | 298 |
| GGAA21G11L  | 14                     | D14S617         | 4   | 90192832     | 0.835032       | 15        | 131               | 187 |
| GGAA3A07M   | 1                      | D1S1612         | 4   | 7827531      | 0.810623       | 26        | 123               | 185 |
| GATA29A01   | 6                      | D6S1959         | 4   | 20020072     | 0.80535        | 9         | 146               | 178 |
| GATA28F03   | 4                      | D4S3248         | 4   | 60024876     | 0.795523       | 13        | 239               | 267 |
| TCTA017M    | 9                      |                 | 4   | 116500000    | 0.795131       | 18        | 158               | 200 |
| AGAT120     | 22                     | SNP343411       | 4   | 19665174     | 0.791061       | 22        | 251               | 293 |
| GATA25A04   | 17                     | D17S1299        | 4   | 39367576     | 0.790268       | 19        | 172               | 218 |
| GATA69C12   | X                      | DXS6810         | 4   | 41949628     | 0.772492       | 17        | 195               | 234 |
| GATA91H06M  | 12                     | D12S1301        | 4   | 42348912     | 0.765451       | 17        | 87                | 129 |
| GATA7F05    | 3                      | D3S3039         | 4   | 73763232     | 0.765164       | 9         | 280               | 312 |
| GATA129D11N | 21                     | D21S2052        | 4   | 27740436     | 0.759255       | 6         | 109               | 129 |
| GATA8C04    | 17                     | D17S974         | 4   | 10719277     | 0.756707       | 10        | 185               | 217 |
| ATA11D10M   | 6                      | D6S1021         | 3   | 104719488    | 0.744306       | 14        | 127               | 150 |
| GATA68A03   | 5                      | D5S2501         | 4   | 110112528    | 0.74394        | 21        | 278               | 386 |
| UT5029      | 12                     | D12S297         | 4   | 50899320     | 0.738263       | 12        | 201               | 245 |
| GATA23D03N  | 2                      | D2S1363         | 4   | 227232144    | 0.733393       | 10        | 180               | 220 |
| GATA24F03   | 7                      | D7S1819-D7S3056 | 4   | 4237377      | 0.731333       | 17        | 146               | 188 |
| GATA4H09    | 1                      | D1S549          | 4   | 216700144    | 0.725471       | 13        | 149               | 205 |
| GATA29F06z  | 20                     | D20S477         | 4   | 22407060     | 0.718056       | 15        | 225               | 260 |
| GGAA9D03    | 17                     | D17S1294        | 4   | 28527738     | 0.716046       | 11        | 216               | 256 |
| GATA74A05   | 14                     |                 | 4   | 32823604     | 0.713761       | 25        | 234               | 310 |
| GATA50F11   | 1                      | D1S1609         | 4   | 241012608    | 0.711939       | 15        | 136               | 180 |

|             |       |          |   |           |          |    |     |     |
|-------------|-------|----------|---|-----------|----------|----|-----|-----|
| AAT243      | 1     |          | 3 | 232893344 | 0.707789 | 12 | 162 | 198 |
| GATA84E11   | 5     | D5S2505  | 4 | 5869851   | 0.707569 | 15 | 249 | 309 |
| GATA81B01   | 6     | D6S1277  | 4 | 164207024 | 0.705836 | 9  | 262 | 302 |
| GATA45B10N  | 20    | D20S480  | 4 | 52542632  | 0.705186 | 14 | 260 | 310 |
| GATA42A03   | 20    | D20S478  | 4 | 37917456  | 0.700475 | 17 | 235 | 303 |
| ATA19H08    | 14    | D14S592  | 3 | 59386896  | 0.698231 | 12 | 204 | 237 |
| GATA49C09N  | 17    | D17S1290 | 4 | 56806088  | 0.694608 | 17 | 169 | 205 |
| ATA23G05    | 18    | D18S858  | 3 | 53046080  | 0.687458 | 9  | 178 | 202 |
| GATA64H04   | 18    | D18S877  | 4 | 24977176  | 0.683377 | 12 | 117 | 145 |
| GATA72E05M  | X     | DXS7132  | 4 | 63522128  | 0.681433 | 17 | 252 | 299 |
| GATA4D07    | 2     | D2S1334  | 4 | 136667216 | 0.676265 | 14 | 310 | 366 |
| GATA187D09N | 9     |          | 4 | 10220368  | 0.670194 | 9  | 172 | 204 |
| GATA6D09    | 18    | D18S851  | 4 | 48359408  | 0.669634 | 16 | 248 | 288 |
| GATA52B03   | X     | DXS6807  | 4 | 4204887   | 0.669253 | 8  | 253 | 281 |
| SDF1        | Xq/Yq | DXYS154  | 2 | 45879692  | 0.666971 | 14 | 218 | 244 |
| AAT262      | 12    |          | 3 | 3885406   | 0.66528  | 9  | 260 | 284 |
| TTCA006M    | 17    |          | 4 | 76200096  | 0.661042 | 6  | 152 | 185 |
| TTA024      | 8     |          | 3 | 24328004  | 0.659971 | 8  | 157 | 178 |
| GATA63D12P  | 12    | D12S1064 | 4 | 89325736  | 0.65937  | 20 | 152 | 210 |
| GATA72E11   | 20    | D20S602  | 4 | 7321075   | 0.657464 | 12 | 233 | 276 |
| GATA7C06M   | 5     | D5S1470  | 4 | 32537792  | 0.65294  | 20 | 174 | 241 |
| GATA169E06  | 14    | D14S1433 | 4 | 73603616  | 0.652587 | 11 | 156 | 196 |
| GATA88F09   | 10    | D10S1435 | 4 | 2197272   | 0.646532 | 19 | 272 | 322 |
| AAT013      | 5     |          | 3 | 173312832 | 0.643743 | 10 | 253 | 277 |
| ATA70B03    | 14    |          | 3 | 21697972  | 0.638726 | 9  | 148 | 172 |
| GATA24D12P  | 7     | D7S1818  | 4 | 48900000  | 0.631705 | 12 | 170 | 214 |
| AAT261      | 9     |          | 3 | 90461120  | 0.628635 | 11 | 117 | 147 |
| GATA63F08P  | 7     | D7S2202  | 4 | 138100000 | 0.626113 | 14 | 140 | 180 |
| GATA63F09   | 11    | D11S2365 | 4 | 55981152  | 0.625502 | 14 | 226 | 258 |
| GATA198B05N | 22    |          | 4 | 16025204  | 0.625136 | 9  | 93  | 125 |
| GATA11C08P  | 13    | D13S1807 | 4 | 53100000  | 0.624227 | 10 | 167 | 197 |
| GATA119B03  | 7     | D7S3047  | 4 | 9219316   | 0.623323 | 11 | 144 | 180 |
| b001ve9     | 9     |          | 2 | 134314912 | 0.622404 | 10 | 145 | 163 |
| GATA157H01  | 18    |          | 4 | 71        | 0.622252 | 14 | 169 | 203 |
| GATA7E12    | 18    | D18S1364 | 4 | 61549128  | 0.619609 | 17 | 144 | 187 |
| GATA22F11NZ | 3     | D3S2427  | 4 | 177105712 | 0.616406 | 19 | 155 | 203 |
| GGAA22G01   | 13    | D13S895  | 4 | 107900000 | 0.614975 | 3  | 127 | 139 |
| GGAA4A12    | 14    | D14S588  | 4 | 68210328  | 0.61258  | 7  | 81  | 121 |
| GATA134B03  | 5     | D5S2845  | 4 | 22436148  | 0.611628 | 7  | 139 | 159 |
| ATA43A10M   | 17    | D17S2193 | 3 | 67144912  | 0.611544 | 13 | 86  | 114 |
| ATA28B11    | 6     | D6S1031  | 3 | 77456936  | 0.605005 | 12 | 254 | 287 |
| AGAT021     | 2     |          | 4 | 242669056 | 0.60499  | 17 | 198 | 246 |

|             |    |                    |   |           |          |    |     |     |
|-------------|----|--------------------|---|-----------|----------|----|-----|-----|
| GATA72G11N  | 2  | D2S1780            | 4 | 3309619   | 0.592942 | 15 | 300 | 344 |
| TAA005      | 9  |                    | 3 | 1641037   | 0.592532 | 9  | 140 | 167 |
| GATA118G10  | 7  | D7S3046            | 4 | 67964440  | 0.592141 | 25 | 277 | 350 |
| ATT198Z     | 14 |                    | 3 | 102317440 | 0.589519 | 6  | 143 | 167 |
| TCTA023     | 14 |                    | 4 | 30524656  | 0.586154 | 9  | 158 | 194 |
| GATA72G09N  | 4  | D4S2632            | 4 | 35601324  | 0.584949 | 14 | 134 | 202 |
| GATA165B12P | X  |                    | 4 | 115600000 | 0.582124 | 7  | 121 | 149 |
| GATA8B05M   | 3  | D3S1768            | 4 | 34596172  | 0.581425 | 8  | 167 | 199 |
| GATA11E02N  | 6  | D6S2410            | 4 | 50690384  | 0.581052 | 18 | 230 | 266 |
| GATA30G01   | 11 | D11S2002           | 4 | 79691712  | 0.580124 | 14 | 232 | 272 |
| GATA48D07   | 9  | D9S930             | 4 | 110616048 | 0.57717  | 16 | 262 | 322 |
| GATA62F03M  | 9  | D9S2169-D4S2624    | 4 | 5190409   | 0.576894 | 15 | 256 | 308 |
| GATA178F11z | 18 |                    | 4 | 2113098   | 0.57404  | 12 | 271 | 319 |
| 035xb9      | 7  | D7S2477-AFMb035xb9 | 2 | 2573040   | 0.573089 | 17 | 140 | 172 |
| GATA133A08Q | 1  |                    | 4 | 105636168 | 0.570328 | 8  | 98  | 134 |
| GATA87G01   | 10 | D10S1432           | 4 | 74004000  | 0.568268 | 12 | 162 | 185 |
| GATA73D10L  | 7  | D7S2204            | 4 | 77738976  | 0.562774 | 16 | 205 | 273 |
| 282zh9      | 9  |                    | 2 | 14344486  | 0.55937  | 14 | 155 | 189 |
| GATA31F01P  | X  | DXS6789            | 4 | 94221096  | 0.559078 | 10 | 105 | 145 |
| ATA27H09    | 2  | D2S1353            | 3 | 159761472 | 0.551058 | 8  | 126 | 150 |
| ATA47D07    | 1  | D1S3720            | 3 | 20381404  | 0.548069 | 6  | 115 | 133 |
| GATA138B05  | 5  |                    | 4 | 71485952  | 0.547897 | 8  | 162 | 194 |
| GGAA2A03    | 19 | D19S433            | 4 | 35108868  | 0.546597 | 14 | 163 | 215 |
| GATA62A12   | 4  | D4S2623            | 4 | 111348528 | 0.544089 | 11 | 177 | 225 |
| GTTT001P    | 15 |                    | 5 | 28700000  | 0.540089 | 8  | 190 | 210 |
| AAT269      | 20 | SNP481439          | 3 | 48642016  | 0.539948 | 10 | 226 | 249 |
| GATA8F07    | 2  | D2S405             | 4 | 29451182  | 0.538375 | 10 | 245 | 273 |
| CAC002      | X  |                    | 3 | 36511000  | 0.536974 | 10 | 190 | 211 |
| GATA51D11   | 5  |                    | 4 | 133000000 | 0.536453 | 3  | 102 | 110 |
| ATA29C07L   | 1  | D1S3462            | 3 | 228985520 | 0.53243  | 10 | 237 | 264 |
| AGAT126     | 5  |                    | 4 | 150833968 | 0.531829 | 12 | 195 | 215 |
| ATA21A03    | 10 | D10S1221           | 3 | 56874496  | 0.530667 | 7  | 195 | 213 |
| 046xf6      | 20 |                    | 2 | 57241284  | 0.525477 | 9  | 119 | 143 |
| ATA9B04N    | 11 | D11S4459           | 3 | 56289880  | 0.521225 | 9  | 234 | 258 |
| GATA52A04M  | 2  | D2S1384            | 4 | 205400000 | 0.521051 | 16 | 130 | 175 |
| GATA74E02Z  | 14 | D14S742            | 4 | 20191104  | 0.520872 | 13 | 336 | 387 |
| GGAA20G04   | 2  | D2S1399            | 4 | 148420880 | 0.519483 | 12 | 125 | 181 |
| ATA2A03     | 4  | D4S2361            | 3 | 85463832  | 0.518723 | 7  | 137 | 155 |
| Mfd232      | 19 | D19S246            | 4 | 55647456  | 0.517577 | 12 | 137 | 177 |
| GATA4H01    | 12 | D12S395            | 4 | 118600416 | 0.51354  | 10 | 201 | 231 |
| GATA28D01M  | 11 | D11S2000           | 4 | 105096456 | 0.513314 | 17 | 196 | 236 |
| ATAG089     | 18 |                    | 4 | 55706068  | 0.512244 | 8  | 156 | 176 |

|             |        |          |   |           |          |    |     |     |
|-------------|--------|----------|---|-----------|----------|----|-----|-----|
| GGAT1A4     | 10     | D10S2327 | 4 | 80056656  | 0.508474 | 10 | 196 | 232 |
| UT6540      | 6      | D6S942   | 4 | 765498    | 0.500161 | 10 | 180 | 220 |
| b329we5     | 14     |          | 2 | 20511740  | 0.495662 | 12 | 85  | 109 |
| GATA8G10M   | 8      | D8S1110  | 4 | 53230932  | 0.494075 | 20 | 251 | 311 |
| AGC001b     | 6      |          | 3 | 170727440 | 0.493931 | 13 | 177 | 240 |
| AAC023      | 3      |          | 3 | 67951712  | 0.493794 | 9  | 204 | 228 |
| TTTA049     | 1      |          | 4 | 244823712 | 0.490819 | 4  | 230 | 246 |
| ATA42G04P   | 9      |          | 2 | 110300000 | 0.490451 | 10 | 180 | 207 |
| GATA7D12    | 9      | D9S301   | 4 | 69259840  | 0.48855  | 13 | 197 | 233 |
| ATA50C05    | 6      | D6S2434  | 3 | 14054316  | 0.488046 | 13 | 200 | 242 |
| TATC043     | X      |          | 4 | 144373552 | 0.486312 | 13 | 234 | 286 |
| GATA4E11    | 2      | D2S410   | 4 | 116336072 | 0.48578  | 11 | 140 | 180 |
| GATA26E03M  | 8      | D8S1132  | 4 | 107285456 | 0.481786 | 15 | 84  | 131 |
| ATAA018P    | 8      |          | 4 | 21257580  | 0.480963 | 7  | 101 | 125 |
| AGAT113Z    | 13     |          | 4 | 109987640 | 0.477992 | 8  | 144 | 172 |
| GATA23E06L  | 11     | D11S1998 | 4 | 117235408 | 0.477661 | 9  | 124 | 156 |
| GATA81D05   | Xq/Yq? | DYS395   | 4 | 2776258   | 0.477268 | 11 | 98  | 146 |
| GATA10G07   | 4      | D4S3243  | 4 | 81390768  | 0.474526 | 8  | 126 | 154 |
| ATT015      | 4      |          | 3 | 13677525  | 0.474449 | 11 | 262 | 283 |
| GATA6A05    | 1      | D1S551   | 4 | 82317888  | 0.47424  | 14 | 170 | 218 |
| ATA23A10M   | 5      | D5S1480  | 3 | 144172224 | 0.471264 | 13 | 207 | 240 |
| GATA88H02N  | 15     | D15S822  | 4 | 24953448  | 0.470898 | 19 | 230 | 282 |
| GGAA3C07    | 21     | D21S1437 | 4 | 20568710  | 0.467513 | 9  | 99  | 131 |
| b037wf5     | 5      |          | 2 | 149944112 | 0.467054 | 5  | 143 | 151 |
| ATA22D02    | 10     | D10S1222 | 3 | 128735152 | 0.466558 | 5  | 221 | 233 |
| GATA24H01N  | 4      | D4S2367  | 4 | 68286184  | 0.466145 | 11 | 111 | 147 |
| AGAT130     | 5      |          | 4 | 125001592 | 0.465374 | 5  | 212 | 222 |
| ATAAC002    | 12     |          | 4 | 10655885  | 0.464438 | 9  | 265 | 310 |
| ATA20G07M   | 5      | D5S2488  | 3 | 180129    | 0.463163 | 18 | 253 | 281 |
| ATA7D07     | 18     | D18S1357 | 3 | 56968832  | 0.459614 | 6  | 117 | 135 |
| GATA6G12    | 3      | D3S2398  | 4 | 190741936 | 0.456669 | 11 | 258 | 302 |
| GATA3H06M   | 5      | D5S1462  | 4 | 96454600  | 0.452636 | 12 | 160 | 208 |
| GATA145D10N | 5      | D5S2849  | 4 | 3477322   | 0.450111 | 9  | 182 | 218 |
| GATA49D12N  | 12     | D3S2395  | 4 | 8048872   | 0.444495 | 15 | 158 | 197 |
| GATA31B09   | 14     |          | 4 | 24645920  | 0.441614 | 11 | 277 | 339 |
| GATA188F04  | 21     | D21S2055 | 4 | 37800000  | 0.440507 | 16 | 85  | 127 |
| GATA23A02   | 2      |          | 4 | 236306288 | 0.439177 | 14 | 143 | 175 |
| ATCC001     | 10     |          | 4 | 6398267   | 0.438679 | 7  | 300 | 324 |
| 242xb10     | 5      |          | 2 | 171273168 | 0.435721 | 21 | 148 | 176 |
| GATA29B01L  | 19     | D19S589  | 4 | 58498396  | 0.435593 | 11 | 168 | 208 |
| GATA2H09    | 5      | D5S816   | 4 | 135377728 | 0.435218 | 8  | 225 | 253 |
| ATA82B02N   | 18     |          | 3 | 67062488  | 0.429597 | 8  | 169 | 190 |

|             |    |               |   |           |          |    |     |     |
|-------------|----|---------------|---|-----------|----------|----|-----|-----|
| GATA70B08   | 21 | D21S1446      | 4 | 46893788  | 0.42483  | 17 | 184 | 227 |
| GGAA2f11N   | 10 | D10S677       | 4 | 95629024  | 0.424812 | 11 | 177 | 229 |
| UT7136      | 22 | D22S532       | 4 | 44399728  | 0.418487 | 11 | 155 | 195 |
| PAH         | 12 | PAH           | 4 | 101785624 | 0.410725 | 11 | 213 | 261 |
| GATA50D10   | 8  | D8S1108       | 4 | 136262704 | 0.408391 | 10 | 244 | 280 |
| GATA3C02M   | 3  | D3S1744       | 4 | 148413424 | 0.404977 | 8  | 128 | 156 |
| ATA28C05    | X  | DXS6795       | 3 | 22605926  | 0.397311 | 2  | 270 | 273 |
| ATA77F05    | 14 |               | 3 | 23739004  | 0.397112 | 11 | 185 | 206 |
| GATA62A04   | 5  | D5S1505       | 4 | 119177864 | 0.395697 | 11 | 187 | 239 |
| GATA81D12M  | 16 | D16S2624      | 4 | 71511312  | 0.394281 | 7  | 117 | 141 |
| ATA3A07     | 16 | D16S748       | 3 | 3370871   | 0.385995 | 10 | 175 | 202 |
| GATA22G05M  | 4  | D4S2366       | 4 | 6549327   | 0.3859   | 8  | 121 | 149 |
| MFD455      | 9  | AAT052        | 3 | 600000    | 0.383623 | 13 | 284 | 305 |
| GATA175H06M | 9  |               | 4 | 8100100   | 0.37721  | 8  | 154 | 186 |
| ATA24A08    | 15 | D15S652       | 3 | 90247136  | 0.376967 | 12 | 273 | 309 |
| ATA10H11    | 3  | D3S2409       | 3 | 49377096  | 0.376416 | 8  | 103 | 130 |
| GATA7H10    | 5  |               | 4 | 166808880 | 0.376099 | 11 | 136 | 175 |
| GATA63A03N  | 15 | D15S659       | 4 | 44090064  | 0.375089 | 9  | 174 | 206 |
| GATA90D07N  | 11 | D11S2371      | 4 | 73231440  | 0.374593 | 8  | 173 | 209 |
| GATA84C01   | 10 | D10S1430      | 4 | 12740995  | 0.369417 | 8  | 132 | 160 |
| GATA13G11   | 7  | D7S817        | 4 | 31800000  | 0.360364 | 14 | 157 | 205 |
| GATA12H10   | 2  | D2S427        | 4 | 232408800 | 0.356479 | 9  | 215 | 245 |
| TTA001      | 16 | MFD466-TTA001 | 3 | 78886368  | 0.354042 | 10 | 263 | 290 |
| GATA4G12    | 2  | D2S434        | 4 | 218779040 | 0.353614 | 11 | 270 | 314 |
| GATA64D04   | 4  |               | 4 | 171280912 | 0.348159 | 11 | 229 | 265 |
| ATA7B01     | 20 |               | 3 | 71424552  | 0.347888 | 9  | 95  | 119 |
| TATC028     | 1  |               | 4 | 165578496 | 0.34683  | 4  | 251 | 258 |
| GATA69E12M  | 2  | D2S1394       | 4 | 731133696 | 0.345717 | 10 | 143 | 179 |
| GATA13      | 18 | D18S535       | 4 | 36400776  | 0.345583 | 13 | 119 | 151 |
| GATA41G07M  | 7  | D7S1802       | 4 | 20449620  | 0.345486 | 15 | 140 | 196 |
| CATA002Z    | 16 |               | 4 | 23716036  | 0.344594 | 4  | 220 | 232 |
| SraP        | 2  | (TPO)         | 4 | 1500000   | 0.342851 | 6  | 116 | 136 |
| GATA23F05   | 7  | D7S1799       | 4 | 103755536 | 0.342575 | 11 | 147 | 191 |
| GATA48H04   | X  | DXS6805       | 4 | 115261312 | 0.339205 | 11 | 312 | 344 |
| ATA27F01    | 21 | D21S1440      | 3 | 38062024  | 0.338961 | 10 | 138 | 165 |
| AAT266      | 5  |               | 3 | 162159216 | 0.338139 | 10 | 252 | 273 |
| GATA5E06P   | 9  | D9S304        | 4 | 32313900  | 0.336159 | 10 | 138 | 178 |
| AAAT126     | 9  |               | 4 | 98769696  | 0.333435 | 9  | 137 | 173 |
| AGAT060     | 18 |               | 4 | 6303943   | 0.331218 | 10 | 263 | 299 |
| GATA67D03   | 5  | D5S2500       | 4 | 58713076  | 0.329758 | 12 | 133 | 181 |
| GATA51B02M  | 13 | D13S796       | 4 | 105586968 | 0.328813 | 12 | 132 | 176 |
| GATA21D04   | 5  | D5S1457       | 4 | 41079360  | 0.327522 | 10 | 99  | 135 |

|             |       |          |   |           |          |    |     |     |
|-------------|-------|----------|---|-----------|----------|----|-----|-----|
| GGAA5F09    | 1     | D1S1679  | 4 | 160000000 | 0.320279 | 12 | 136 | 184 |
| ATA5A09N    | 13    |          | 3 | 28870680  | 0.319214 | 10 | 141 | 162 |
| ATA31G11P   | 10    | D10S1412 | 3 | 9200000   | 0.318828 | 10 | 158 | 185 |
| ATA1B07     | 11    | D11S1993 | 3 | 43574408  | 0.31746  | 9  | 200 | 227 |
| GATA21F05   | 9     | D9S922   | 4 | 78425464  | 0.317248 | 11 | 271 | 315 |
| GATA189C06M | 7     | D7S3070  | 4 | 150958848 | 0.317083 | 10 | 157 | 193 |
| GATA48E02   | 11    | D11S1981 | 4 | 17050512  | 0.315969 | 17 | 130 | 174 |
| UT721M      | 8     | D8S373   | 4 | 144330496 | 0.315736 | 14 | 170 | 218 |
| GATA31      | 6     | D6S474   | 4 | 112924672 | 0.310295 | 9  | 131 | 163 |
| GATA22F09P  | 16    | D16S3253 | 4 | 54565224  | 0.299639 | 10 | 184 | 215 |
| ATA79C10    | 1     | D1S3776  | 3 | 34055604  | 0.294441 | 10 | 232 | 250 |
| GATA27C08P  | 3     | D3S2432  | 4 | 32136946  | 0.290464 | 11 | 135 | 168 |
| GATA27G03   | 4     | D4S2368  | 4 | 169412176 | 0.288227 | 7  | 300 | 324 |
| GATA51D03   | 20    | D20S482  | 4 | 4501279   | 0.286317 | 9  | 143 | 183 |
| GATA47F05   | 20    | D20S481  | 4 | 44453712  | 0.286093 | 11 | 209 | 241 |
| GATA11C06N  | 16    | D16S539  | 4 | 86167736  | 0.285508 | 10 | 144 | 170 |
| GATA124C08N | 1     |          | 4 | 98148272  | 0.28374  | 9  | 111 | 147 |
| GGAT3F08    | Xq/Yq | DXS9900  | 4 | 185625776 | 0.283391 | 7  | 150 | 174 |
| GATA71C09   | 10    | D10S1425 | 4 | 119004744 | 0.280012 | 3  | 144 | 152 |
| ATA12D05P   | 6     | D6S1022  | 3 | 28700000  | 0.279184 | 9  | 116 | 143 |
| GATA27Z     | 9     | D9S299   | 4 | 104070264 | 0.275011 | 9  | 201 | 233 |
| ATTC013     | 20    |          | 4 | 9533638   | 0.273604 | 9  | 86  | 118 |
| ATA26B08    | 4     | D4S2394  | 3 | 130756656 | 0.270905 | 7  | 241 | 259 |
| 4PTL04      | 4     | D4S3360  | 2 | 105905    | 0.270571 | 8  | 168 | 182 |
| GATA11H10   | 2     | D2S1360  | 4 | 17476470  | 0.270055 | 11 | 120 | 148 |
| ATT070      | 8     |          | 3 | 14933155  | 0.269669 | 6  | 188 | 203 |
| GATA7F09    | 12    |          | 4 | 5837039   | 0.266069 | 9  | 258 | 286 |
| GATA88G05   | 2     | D2S1790  | 4 | 85049832  | 0.26092  | 9  | 292 | 328 |
| GATA6C01    | 12    | D12S373  | 4 | 16906264  | 0.259527 | 8  | 192 | 224 |
| GATA129B03N | 20    | D20S1143 | 4 | 15293073  | 0.258607 | 9  | 160 | 192 |
| Mfd235      | 19    |          | 4 | 38789996  | 0.258443 | 9  | 187 | 215 |
| GATA124E07  | X     | DXS9896  | 4 | 28698586  | 0.257784 | 8  | 171 | 199 |
| GATA124F08  | 1     | D1S3761  | 4 | 206052656 | 0.252991 | 9  | 213 | 245 |
| GATA11A11P  | 5     | D5S1456  | 4 | 169013408 | 0.250081 | 13 | 175 | 211 |
| GATA32F05   | 12    | D12S2078 | 4 | 126314240 | 0.248127 | 11 | 246 | 274 |
| GATA61G06   | 7     |          | 4 | 5374993   | 0.243222 | 9  | 90  | 117 |
| GATA168F06  | 14    | D14S1434 | 4 | 93298400  | 0.241214 | 7  | 212 | 236 |
| GGAA20C10M  | 8     | D8S1477  | 4 | 32124836  | 0.238203 | 7  | 132 | 156 |
| ATG021      | 12    |          | 3 | 13669000  | 0.236508 | 6  | 95  | 110 |
| ATA22E01    | 3     | D3S2418  | 3 | 193637920 | 0.23465  | 3  | 96  | 102 |
| GATA7G10    | 13    | D13S317  | 4 | 80520064  | 0.233762 | 8  | 155 | 199 |
| GATA177C03N | 18    | D18S1371 | 4 | 71237728  | 0.230902 | 8  | 117 | 145 |

|             |    |                |   |           |          |    |     |     |
|-------------|----|----------------|---|-----------|----------|----|-----|-----|
| GATA184A08  | 6  |                | 4 | 147947632 | 0.22954  | 12 | 153 | 181 |
| b014ye5     | 9  |                | 2 | 89826616  | 0.226578 | 6  | 176 | 186 |
| ATA22G07P   | 6  | D6S1027        | 3 | 168965744 | 0.225575 | 6  | 118 | 136 |
| GATA73D11   | 5  |                | 4 | 114294904 | 0.224407 | 8  | 208 | 240 |
| ATA6C09P    | 6  | D6S1035        | 3 | 159936288 | 0.223219 | 10 | 120 | 147 |
| AGAT010     | 3  | MFD433-AGAT010 | 4 | 2693695   | 0.222193 | 5  | 268 | 276 |
| GATA85A04M  | 12 | D12S1300       | 4 | 97003408  | 0.220424 | 9  | 104 | 140 |
| ATA42G12M   | 1  |                | 3 | 106430320 | 0.213899 | 9  | 170 | 194 |
| GATA158H04  | 17 | g10693         | 4 | 6533636   | 0.213877 | 8  | 162 | 194 |
| ATA18A07M   | 9  | D9S910         | 3 | 97003728  | 0.211294 | 8  | 109 | 127 |
| GATA6B02P   | 8  | D8S592         | 4 | 117400000 | 0.210334 | 7  | 141 | 165 |
| GATA72H07   | 1  | D1S2134        | 4 | 47651184  | 0.204464 | 10 | 265 | 301 |
| GATA131D09  | 3  |                | 4 | 4288116   | 0.204275 | 9  | 131 | 159 |
| GATA68F07   | 3  | D3S2460        | 4 | 118723280 | 0.203331 | 11 | 147 | 175 |
| ATA092      | 5  |                | 3 | 140333584 | 0.202629 | 8  | 211 | 232 |
| GATA90G11M  | 14 | D14S748        | 4 | 46071316  | 0.199056 | 8  | 221 | 253 |
| AGAT128     | 3  | SNP504344      | 4 | 62464944  | 0.197684 | 10 | 242 | 286 |
| GATA23F06L  | 11 | D11S1999       | 4 | 10684295  | 0.19454  | 3  | 88  | 96  |
| GATA70E01   | 4  |                | 4 | 20864456  | 0.192423 | 8  | 158 | 190 |
| GATA66B04   | 19 | D19S714        | 4 | 15589133  | 0.188143 | 12 | 224 | 271 |
| AAT107      | 16 |                | 3 | 59668096  | 0.187152 | 7  | 194 | 230 |
| GATA73D01   | 3  | D3S3038        | 4 | 21924468  | 0.185125 | 9  | 167 | 199 |
| GATA23F08   | 6  | D6S1040        | 4 | 130966320 | 0.183442 | 7  | 257 | 289 |
| GATA50C10   | 5  |                | 4 | 116007288 | 0.181308 | 8  | 298 | 322 |
| GATA3E10    | 5  | D5S817         | 4 | 11638225  | 0.181035 | 8  | 244 | 272 |
| GATA43H01M  | 14 | D14S608        | 4 | 26839482  | 0.17547  | 11 | 193 | 229 |
| GATA68H04   | 6  | D6S1056        | 4 | 94093104  | 0.174924 | 11 | 225 | 257 |
| GATA22H04M  | 9  |                | 4 | 77000000  | 0.173861 | 8  | 191 | 219 |
| GTT028      | 1  |                | 3 | 166402000 | 0.170747 | 7  | 169 | 187 |
| GATA144D04  | X  |                | 4 | 44059432  | 0.167258 | 4  | 230 | 242 |
| GATA115E01N | 10 | D10S2470       | 4 | 92029192  | 0.166025 | 11 | 226 | 270 |
| ATA37D06    | 22 | D22S1045       | 3 | 35779336  | 0.163614 | 8  | 137 | 158 |
| GATA11E09   | 4  | D4S1644        | 4 | 142329088 | 0.163119 | 9  | 174 | 206 |
| GATA64F08   | 13 | D13S800        | 4 | 71672696  | 0.163084 | 9  | 283 | 323 |
| TAGA006     | 4  |                | 4 | 119476504 | 0.154063 | 9  | 228 | 260 |
| GATA121A08N | 10 |                | 4 | 69857176  | 0.152802 | 8  | 176 | 208 |
| TATC010     | 7  |                | 4 | 7477116   | 0.15153  | 8  | 212 | 240 |
| GGAA23C05N  | 10 | D10S1248       | 4 | 130566864 | 0.148696 | 9  | 229 | 261 |
| GATA41A01   | 8  | D8S1136        | 4 | 65300000  | 0.147956 | 5  | 225 | 241 |
| GATA107     | 4  | D4S1625        | 4 | 144078576 | 0.143052 | 8  | 182 | 210 |
| GATA64G07   | 9  | D9S934         | 4 | 116471800 | 0.141294 | 8  | 194 | 222 |
| UT1772      | 20 | D20S164        | 4 | 57738776  | 0.138713 | 2  | 183 | 187 |

|             |    |           |   |           |            |   |     |     |
|-------------|----|-----------|---|-----------|------------|---|-----|-----|
| GATA48B01   | 1  | D1S1660   | 4 | 195899600 | 0.130989   | 7 | 222 | 246 |
| GATA71D01   | 2  | D2S1776   | 4 | 169847760 | 0.126116   | 5 | 276 | 300 |
| AAT245      | 17 | SNP427776 | 4 | 55774500  | 0.124988   | 3 | 152 | 156 |
| GAAT1A4N    | 8  |           | 4 | 99146360  | 0.114135   | 4 | 128 | 140 |
| AGAT144     | X  | SNP554669 | 4 | 8120196   | 0.113157   | 4 | 312 | 328 |
| GATA26G09P  | 1  | D1S1596   | 4 | 59100152  | 0.109177   | 5 | 116 | 132 |
| GATA52A12   | 5  | D5S1501   | 4 | 78552528  | 0.0940846  | 4 | 84  | 90  |
| AGAT125     | 9  | SNP446030 | 4 | 127327088 | 0.0872513  | 5 | 159 | 175 |
| GATA151F03N | 15 | D15S1507  | 4 | 63055828  | 0.0802105  | 5 | 204 | 220 |
| GATA172D05  | X  |           | 4 | 111938560 | 0.0772652  | 3 | 103 | 109 |
| ATGG002     | 14 |           | 4 | 97207552  | 0.0520637  | 2 | 204 | 212 |
| ATA26D07    | 13 | D13S779   | 3 | 99201952  | 0.051547   | 2 | 157 | 159 |
| GTTT002     | 7  | MFD442    | 4 | 155405904 | 0.0482547  | 3 | 267 | 275 |
| AAT071      | 3  |           | 3 | 151483952 | 0.0473206  | 5 | 159 | 166 |
| ATA34G06    | 3  | D3S4523   | 3 | 122212976 | 0.0395617  | 3 | 228 | 234 |
| TTA032z     | 6  |           | 3 | 7637946   | 0.0279654  | 2 | 171 | 174 |
| ATA24F10    | 10 | D10S1225  | 3 | 64099648  | 0.0135139  | 2 | 166 | 169 |
| ATA29C03    | 10 | D10S1230  | 3 | 122407280 | 0.00337425 | 2 | 114 | 117 |
